# Supplementary material for: Evaluation of the Approach towards Vaccination against COVID-19 among the Polish Population—In Relation to Sociodemographic Factors and Physical and Mental Health
Source: MDPI journal article supplement (doi:10.3390/vaccines11030700), 2023-03-19
Supplement: s1 [file s1]

**Table S1:** Questionnaire used in our study to determine the attitude towards influenza and COVID-19 vaccination among Polish respondents (n=200,000).

| <b>Q1: Are you vaccinated against influenza?</b>             |                                                                                                                |
|--------------------------------------------------------------|----------------------------------------------------------------------------------------------------------------|
| Points:                                                      | Answers:                                                                                                       |
| 1                                                            | Yes, every year, including in 2022                                                                             |
| 2                                                            | Yes, every year, but I couldn't take an influenza vaccination in 2022 due to the lack of its availability      |
| 3                                                            | Yes, but not every year. I got the influenza vaccine in 2022                                                   |
| 4                                                            | Yes, but not every year. I wanted to get a vaccine in 2022, but I couldn't due to the lack of its availability |
| 5                                                            | Usually not, but I got the influenza vaccine in 2022                                                           |
| 6                                                            | Usually not. I wanted to get a vaccine in 2022, but I couldn't due to the lack of its availability.            |
| 7                                                            | No, never                                                                                                      |
| <b>Q2: Are you going to take a vaccine against COVID-19?</b> |                                                                                                                |
| 1                                                            | Yes, I have already been vaccinated                                                                            |
| 2                                                            | Yes, I intend to take a COVID-19 vaccination                                                                   |
| 3                                                            | I don't know yet                                                                                               |
| 4                                                            | No, never                                                                                                      |
| <b>Q3: Why won't you take a COVID-19 vaccination?</b>        |                                                                                                                |
| 1                                                            | I have concerns about the safety of the COVID-19 vaccine                                                       |
| 2                                                            | I am afraid of post-vaccination complications                                                                  |
| 3                                                            | I can't get vaccinated due to medical reasons                                                                  |
| 4                                                            | I am against vaccination in general                                                                            |
